# Supplementary material for: Comparative Expression Profiles of Midgut Genes in Dengue Virus Refractory and Susceptible Aedes aegypti across Critical Period for Virus Infection
Source: PLoS One. 2012 Oct 15;7(10):e47350. doi: 10.1371/journal.pone.0047350 (PMC3471866; doi:10.1371/journal.pone.0047350)
Supplement: Table S1 — List of differentially expressed transcripts (DETs) at different post-infection time points. The DETs in red are up-regulated in Moyo-S but down-regulated in Moyo-D. The DETs in blue are up-regulated in Moyo-D but down-regulated in Moyo-S. The post infection time(s) at which the transcripts are differentially expressed are shown in bold. (XLSX) [file pone.0047350.s004.xlsx]

## Sheet: Sheet1
List of differentially expressed transcripts (DETs) at different post-infection time points. Although we used 7% false discovery rate to identify signifcant transcripts, many of these DETs are significant at 5% FDR. The DETs in red are up-regulated in Moyo-S but down-regulated in Moyo-D. The DETs in blue are up-regulated in Moyo-D but down-regulated in Moyo-S. Annotated gene ID (VectorBase ID) of…
1-hr	False Discovery Rate	Gene ID	24-hr	False Discovery Rate	Gene ID	48-hr	False Discovery Rate	Gene ID	1-hr and 24-hr	False Discovery Rate	Gene ID	24-hr and 48-hr	False Discovery Rate	Gene ID	48-hr and 96-hr	False Discovery Rate	Gene ID	1-hr, 24-hr and 48-hr	False Discovery Rate	Gene ID	4-hr, 48-hr and 96-hr	False Discovery Rate	Gene ID	4-hr, 24-hr, 48-hr and 96-hr	False Discovery Rate	Gene ID	1-hr, 4-hr, 24-hr, 48-hr and 96-hr	False Discovery Rate	Gene ID
NAAF328	0.05	N/A	NAAFY66	0.05	AAEL009244	NAAGU66	0.05	N/A	NAAFP45	0.07	AAEL006820	NAAHH75	0.07	AAEL009879	NAAF104	0.07	AAEL013484	NAAHG30	0.05	AAEL006678	NAAFF49	0.05	AAEL006771	NAAF684	0.05	AAEL001601	NAAF030	0.07	AAEL014489
NAAF786	0.05	N/A	NAAG048	0.07	N/A	NAAHZ91	0.07	N/A	NAAFU58	0.05	N/A	NABMR75	0.07	AAEL000064	NAAFN60	0.05	AAEL003128	NAAHN69	0.07	N/A	NAAFJ07	0.05	N/A	NAAF868	0.05	AAEL012586	NAAF041	0.07	AAEL001828
NAAFC01	0.05	AAEL003401	NAAGC75	0.05	AAEL002468	NABMC42	0.05	N/A	NAAHM07	0.05	N/A	NABN949	0.07	AAEL014905	NAAFS71	0.05	N/A	NAAI814	0.05	AAEL001190	NAAGK01	0.05	N/A	NAAFJ64	0.05	N/A	NAAF402	0.07	AAEL008581
NAAFD01	0.05	N/A	NAAGU64	0.05	AAEL008377	NABOO26	0.07	N/A	NABON80	0.05	AAEL010679	NABNS62	0.07	N/A	NAAG546	0.05	N/A	NAAIE75	0.05	N/A	NAAGN35	0.05	AAEL009539	NAAFU05	0.05	AAEL016967	NAAF638	0.07	N/A
NAAFN21	0.05	N/A	NAAH268	0.07	AAEL002652	NABQ309	0.05	N/A	NABPH57	0.07	AAEL004980	NABOB82	0.05	AAEL000292	NAAGN55	0.05	AAEL009389	NABNT73	0.07	N/A	NAAGT83	0.07	N/A	NAAG654	0.05	AAEL000550	NAAF645	0.05	AAEL011057
NAAFX55	0.07	AAEL002503	NAAHQ21	0.05	N/A	NABR986	0.07	N/A	NABQ615	0.05	AAEL013404	NABOZ87	0.05	AAEL005852	NAAGU95	0.07	AAEL017110	NABOV36	0.07	AAEL004942	NAAHM19	0.05	AAEL002161	NAAGC20	0.05	AAEL004945	NAAF703	0.07	AAEL006061
NAAG077	0.07	AAEL012874	NAAHS33	0.07	AAEL013252	NACAD32	0.05	AAEL002818	NABQ662	0.07	AAEL000467	NABUT54	0.07	AAEL014625	NABMC20	0.05	N/A	NABPH06	0.07	AAEL009563	NAAHT01	0.05	AAEL009815	NAAGW41	0.07	AAEL014104	NAAF921	0.07	AAEL000044
NAAG636	0.07	AAEL013995	NAAI038	0.07	N/A	NACAG59	0.07	AAEL010798	NABR553	0.07	AAEL008454	NABUZ06	0.07	N/A	NABMI71	0.07	AAEL005849	NACBS52	0.07	N/A	NAAI115	0.07	AAEL003600	NAAHI33	0.05	N/A	NAAFC23	0.05	AAEL012093
NAAG963	0.07	AAEL002917	NAAID58	0.07	N/A	NACBF44	0.05	N/A	NABRP88	0.07	AAEL011222	NABW541	0.07	AAEL005364	NABND01	0.05	N/A	NADC933	0.05	N/A	NAAIA81	0.05	AAEL004427	NAAHK03	0.07	N/A	NAAFD60	0.07	AAEL004805
NAAGG69	0.05	AAEL010205	NABMZ55	0.05	AAEL013973	NACNR92	0.07	AAEL008392	NABS739	0.05	N/A	NABWC56	0.07	AAEL000040	NABND89	0.05	N/A	NADE580	0.05	N/A	NABN546	0.07	AAEL006772	NAAHM52	0.05	AAEL005950	NAAFO24	0.05	N/A
NAAGJ30	0.05	N/A	NABN845	0.07	AAEL010583	NACNS75	0.05	N/A	NABSB38	0.07	N/A	NABX451	0.07	N/A	NABNH48	0.05	N/A	NABOM61	0.07	AAEL004333	NABN636	0.05	AAEL006589	NAAHV58	0.05	AAEL010219	NAAG295	0.05	AAEL003349
NAAGJ89	0.07	AAEL004901	NABNM65	0.07	N/A	NADAL87	0.07	AAEL012326	NABSN02	0.07	N/A	NABXM48	0.05	N/A	NABO439	0.05	AAEL013250	NABOQ69	0.07	AAEL005410	NABNG46	0.05	AAEL008226	NABM731	0.05	AAEL000832	NAAGN67	0.05	AAEL009217
NAAGK07	0.05	AAEL009510	NABOB69	0.07	AAEL007551	NADAT21	0.05	AAEL002010	NABTY29	0.07	N/A	NABXY85	0.05	N/A	NABOJ96	0.05	AAEL010095	NABSB18	0.07	N/A	NABNU74	0.07	AAEL014168	NABM873	0.05	AAEL013999	NAAGQ14	0.05	AAEL012078
NAAGO01	0.05	AAEL012863	NABOE66	0.05	AAEL002813	NADD888	0.07	AAEL000604	NABUV81	0.07	AAEL014915	NABZB78	0.05	N/A	NABP123	0.05	AAEL004574	NABST59	0.05	N/A	NABNV38	0.05	AAEL013111	NABMB77	0.07	AAEL004891	NAAGX23	0.05	N/A
NAAGP79	0.07	AAEL002533	NABOU28	0.07	AAEL001787	NADED56	0.05	N/A	NABW848	0.05	AAEL000267	NACA003	0.05	N/A	NABQ421	0.07	N/A	NADCF94	0.05	AAEL008674	NABO660	0.07	AAEL012480	NABMH56	0.05	N/A	NAAH277	0.07	AAEL008424
NAAGT23	0.05	N/A	NABPA50	0.05	AAEL007289	NAAG166	0.05	N/A	NABWF11	0.05	AAEL009386	NACAG36	0.05	AAEL004148	NABQC15	0.07	AAEL005694				NABOD19	0.07	N/A	NABN531	0.07	AAEL007752	NAAH354	0.07	N/A
NAAGV70	0.07	AAEL005477	NABPB74	0.07	N/A	NAAG794	0.05	AAEL007075	NABWX66	0.07	AAEL014285	NACAK48	0.05	AAEL003483	NABRF41	0.07	N/A				NABOQ43	0.05	AAEL013390	NABNV47	0.05	N/A	NAAHI08	0.05	AAEL012816
NAAGW30	0.05	AAEL008119	NABQ342	0.05	N/A	NAAHP79	0.07	AAEL005931	NACA061	0.07	AAEL003248	NADBB13	0.07	AAEL001997	NABS133	0.07	AAEL001175				NABOU21	0.05	AAEL008716	NABO290	0.05	N/A	NAAHJ19	0.07	AAEL001767
NAAHG08	0.07	AAEL008611	NABQB68	0.07	AAEL008375	NAAHU73	0.07	N/A	NACAD88	0.05	N/A	NADCI21	0.05	AAEL013338	NABS668	0.05	N/A				NABPC63	0.07	AAEL007419	NABO463	0.05	AAEL003583	NAAHM86	0.07	AAEL011306
NAAHK38	0.05	N/A	NABRB33	0.07	AAEL006728	NAAHX60	0.05	AAEL004041	NACAE33	0.07	AAEL017121	NADCT84	0.05	N/A	NABSS45	0.05	N/A				NABPN04	0.05	N/A	NABOE08	0.07	N/A	NAAHO91	0.05	AAEL006941
NAAHZ28	0.05	AAEL012502	NABRB41	0.07	AAEL009126	NABRM90	0.05	AAEL011998	NACAS57	0.05	AAEL011362	NADE761	0.07	AAEL006030	NABSS55	0.05	N/A				NABPR43	0.05	AAEL000760	NABON70	0.05	AAEL010276	NAAHV16	0.05	AAEL005944
NAAI008	0.07	AAEL006294	NABRD41	0.07	AAEL005706	NABW816	0.05	AAEL002023	NACAU43	0.07	AAEL001798	NAAGW45	0.07	N/A	NABUN81	0.07	N/A				NABRY10	0.07	AAEL003623	NABP741	0.05	AAEL000240	NAAI257	0.05	N/A
NAAI476	0.07	AAEL002160	NABRI46	0.05	AAEL004358	NABW965	0.05	N/A	NACAY34	0.07	AAEL010540	NAAIC94	0.05	AAEL001264	NABWA35	0.07	N/A				NABTC58	0.05	AAEL000939	NABPB61	0.07	AAEL002979	NAAI466	0.07	AAEL004496
NABM592	0.07	N/A	NABRO65	0.07	AAEL010977	NABWG67	0.07	AAEL010099	NACB266	0.05	AAEL010318	NABMG46	0.07	AAEL017116	NABWB21	0.05	AAEL009414				NABU115	0.05	N/A	NABPB91	0.07	N/A	NAAI505	0.07	AAEL002920
NABMF91	0.05	N/A	NABRQ79	0.07	AAEL007813	NABWW78	0.05	AAEL006291	NACBL91	0.05	N/A	NABNA74	0.05	N/A	NABWM31	0.05	AAEL017044				NABUG10	0.05	N/A	NABPK66	0.05	AAEL008366	NAAI567	0.07	AAEL017018
NABMY10	0.07	N/A	NABRT38	0.07	AAEL007290	NABXQ68	0.05	AAEL008141	NACMJ27	0.07	AAEL011742	NABNU29	0.05	AAEL003255	NABWO42	0.07	AAEL003108				NABUM46	0.07	AAEL008900	NABPN47	0.05	AAEL012508	NAAIA18	0.07	N/A
NABN912	0.07	N/A	NABRY87	0.07	AAEL010619	NABXR15	0.05	AAEL014035	NACNN31	0.05	N/A	NABPJ09	0.07	N/A	NABWU29	0.05	AAEL009291				NABW983	0.07	N/A	NABQ331	0.07	N/A	NAAID02	0.05	AAEL002797
NABND51	0.05	N/A	NABS012	0.07	N/A	NACA041	0.05	N/A	NACNV06	0.05	N/A	NABPP11	0.07	N/A	NABWU93	0.07	AAEL017550				NABWA34	0.07	N/A	NABQ809	0.05	N/A	NAAID82	0.05	AAEL001392
NABND83	0.05	AAEL012744	NABS284	0.05	N/A	NACAW29	0.05	AAEL007746	NADAF12	0.07	N/A	NABQ337	0.05	AAEL004568	NABXW05	0.05	AAEL006632				NABWF26	0.07	N/A	NABS845	0.05	N/A	NABM978	0.07	N/A
NABNE32	0.05	AAEL017122	NABS962	0.07	AAEL017269	NACM511	0.05	AAEL003219	NADAU22	0.05	AAEL002103	NABRJ06	0.07	N/A	NABY432	0.07	AAEL009457				NABX304	0.07	AAEL017087	NABSU07	0.05	N/A	NABMC88	0.05	N/A
NABNG80	0.05	N/A	NABSA60	0.07	N/A	NADBM23	0.05	N/A	NADCQ09	0.07	N/A	NABT777	0.07	AAEL011413	NABY482	0.07	AAEL000177				NABXE43	0.07	AAEL009112	NABSZ13	0.05	AAEL005160	NABMS71	0.07	AAEL008388
NABNN45	0.05	N/A	NABSB73	0.07	AAEL007353	NADVG96	0.07	N/A	NADDC89	0.05	AAEL000758	NABTI38	0.05	N/A	NABZ268	0.07	AAEL014640				NABXN13	0.05	AAEL007817	NABUT19	0.05	N/A	NABMV08	0.07	AAEL003426
NABNR37	0.05	N/A	NABSK80	0.05	N/A	NADXZ63	0.05	AAEL011851	NADDF21	0.07	N/A	NABX437	0.05	N/A	NABZ542	0.05	N/A				NABXS73	0.07	N/A	NABW403	0.05	N/A	NABN085	0.05	N/A
NABNS60	0.07	AAEL007665	NABTX91	0.07	N/A	NADYU71	0.05	N/A	NADVN16	0.07	N/A	NABXJ54	0.07	AAEL003671	NACA391	0.05	AAEL003377				NABXW19	0.07	N/A	NABWF58	0.07	N/A	NABNF94	0.07	N/A
NABNY54	0.05	N/A	NABV789	0.07	AAEL006716				NAAF792	0.07	AAEL004497	NABZ386	0.05	AAEL008631	NACAF23	0.05	AAEL013275				NABXX69	0.05	AAEL002870	NABWY57	0.05	N/A	NABNG17	0.05	N/A
NABP820	0.05	AAEL014042	NABW285	0.07	N/A				NAAFV51	0.05	AAEL002526	NACAI12	0.05	N/A	NACAL57	0.07	AAEL007506				NABXY25	0.05	N/A	NABX696	0.05	AAEL006169	NABNQ84	0.07	N/A
NABPJ61	0.05	AAEL001505	NABW351	0.07	N/A				NAAGX62	0.05	AAEL006599	NACBB23	0.07	N/A	NACBC19	0.07	AAEL005881				NABY234	0.05	AAEL008786	NABXH59	0.05	AAEL003887	NABNV63	0.05	N/A
NABPP60	0.05	N/A	NABW730	0.07	AAEL006301				NAAHW85	0.07	N/A	NACBL60	0.07	AAEL004148	NACBE52	0.07	N/A				NABY263	0.05	AAEL011641	NABXK95	0.05	N/A	NABNY43	0.05	AAEL010911
NABQA81	0.05	N/A	NABWA19	0.07	N/A				NAAI766	0.05	N/A	NACNH93	0.05	N/A	NACBO78	0.05	N/A				NABYA27	0.05	AAEL006460	NACA002	0.07	AAEL003091	NABNY49	0.05	N/A
NABQB15	0.07	AAEL007301	NABWJ67	0.05	N/A				NABMX74	0.05	AAEL005547	NADA453	0.05	N/A	NACBR73	0.07	AAEL012166				NABZ153	0.05	AAEL006052	NACA846	0.05	AAEL004910	NABO464	0.05	AAEL013040
NABQB32	0.07	N/A	NABWZ44	0.05	N/A				NABND03	0.07	N/A	NADC018	0.05	AAEL005857	NACMB70	0.07	N/A				NABZ513	0.05	AAEL010520	NACAE65	0.07	N/A	NABO623	0.05	N/A
NABQF83	0.05	AAEL005564	NABX839	0.05	N/A				NABNL11	0.05	N/A				NADA867	0.07	AAEL011810				NABZA34	0.05	AAEL013859	NACAF90	0.05	AAEL010063	NABO631	0.07	AAEL006251
NABR558	0.05	AAEL013284	NABXB58	0.05	N/A				NABP405	0.05	N/A				NADA891	0.05	N/A				NACA103	0.07	N/A	NACB743	0.05	AAEL009142	NABOC21	0.05	N/A
NABR619	0.07	N/A	NABXQ12	0.07	AAEL012499				NABP584	0.05	AAEL008576				NADAC03	0.05	AAEL010025				NACA836	0.07	N/A	NACB758	0.07	N/A	NABOE34	0.05	AAEL005538
NABR844	0.07	AAEL014562	NABXW42	0.07	N/A				NABPD14	0.05	AAEL006647				NADAF10	0.05	AAEL009101				NACBC08	0.07	AAEL005951	NACB833	0.05	AAEL005068	NABOE52	0.05	AAEL003494
NABRA75	0.07	N/A	NABZ252	0.05	N/A				NABQF37	0.07	AAEL006467				NADAT09	0.07	AAEL002083				NACBG41	0.07	N/A	NACBP54	0.07	N/A	NABOE87	0.05	N/A
NABRM68	0.07	AAEL003431	NABZC70	0.07	N/A				NABR933	0.05	AAEL004118				NADAW02	0.05	AAEL006354				NACBQ19	0.07	AAEL000003	NACM093	0.05	N/A	NABOF24	0.07	N/A
NABRS63	0.07	AAEL004657	NACA415	0.05	N/A				NABRT95	0.07	N/A				NADBE42	0.07	AAEL002322				NACMF40	0.05	AAEL003387	NACM487	0.07	AAEL010326	NABOI38	0.07	N/A
NABRT63	0.05	AAEL004365	NACA467	0.07	AAEL011326				NABRU44	0.05	AAEL002326				NADBS95	0.07	AAEL008198				NACMJ73	0.07	AAEL012233	NACM533	0.07	AAEL010337	NABOI47	0.05	AAEL006207
NABRW91	0.07	N/A	NACA477	0.07	N/A				NABRZ89	0.05	AAEL004315				NADBU38	0.07	AAEL006806				NACMU27	0.05	AAEL010047	NACM945	0.05	N/A	NABOK43	0.05	N/A
NABS041	0.07	N/A	NACAB73	0.07	N/A				NABS954	0.05	AAEL011276				NADBV43	0.07	AAEL002719				NACMY47	0.07	N/A	NACMI31	0.07	N/A	NABOL89	0.05	N/A
NABS876	0.07	N/A	NACAJ21	0.05	N/A				NABT155	0.05	N/A				NADBZ21	0.07	AAEL008058				NACN284	0.05	N/A	NACMJ64	0.05	N/A	NABOP03	0.07	AAEL005676
NABSA42	0.05	N/A	NACAO92	0.07	AAEL001065				NABT862	0.05	N/A				NADC210	0.07	N/A				NACN615	0.07	N/A	NACN467	0.07	N/A	NABOV11	0.05	AAEL000859
NABSJ52	0.05	AAEL010738	NACAU89	0.05	AAEL004027				NABTF26	0.07	AAEL008179				NADC292	0.07	N/A				NACNT18	0.05	N/A	NACN586	0.05	AAEL005799	NABOV94	0.05	AAEL006138
NABTI60	0.05	AAEL009320	NACB836	0.07	N/A				NABUR68	0.05	N/A				NADCB09	0.05	AAEL010159				NACNU62	0.05	N/A	NACNS83	0.05	AAEL013068	NABOX63	0.07	N/A
NABU022	0.07	N/A	NACBG69	0.05	AAEL013614				NABWE85	0.05	N/A				NADCE09	0.07	N/A				NADA070	0.05	AAEL010765	NADAG74	0.07	AAEL002272	NABOY56	0.07	N/A
NABUF52	0.05	N/A	NACBJ90	0.05	AAEL014946				NABY619	0.07	AAEL003623				NADCU14	0.05	AAEL000804				NADCE56	0.07	AAEL001851	NADAQ79	0.05	N/A	NABP546	0.05	N/A
NABUL56	0.05	AAEL000672	NACN565	0.07	AAEL015004				NACA828	0.05	AAEL001091				NADD225	0.07	AAEL005504				NADW930	0.05	N/A	NADB058	0.05	N/A	NABP616	0.05	N/A
NABW767	0.05	AAEL006876	NACN632	0.07	N/A				NACAB59	0.07	AAEL011693				NADD684	0.07	AAEL013535				NADWA40	0.05	AAEL009709	NADCF36	0.05	AAEL011753	NABPB22	0.07	AAEL008107
NABWC19	0.07	N/A	NACNJ53	0.05	AAEL008234				NACAH73	0.07	AAEL002569				NADD787	0.07	N/A				NADWE54	0.05	N/A	NADCG11	0.07	AAEL004088	NABPH01	0.05	AAEL005040
NABWG47	0.07	AAEL007938	NACNK16	0.05	AAEL009658				NACAS51	0.05	N/A				NADD853	0.05	AAEL017144				NADXW57	0.05	AAEL000666	NADCJ58	0.05	N/A	NABPJ55	0.05	AAEL013275
NABWH15	0.05	AAEL011518	NADAH36	0.05	N/A				NACAU26	0.07	AAEL007583				NADDC53	0.07	AAEL012258				NADZ159	0.05	N/A	NADD255	0.05	AAEL001806	NABPK82	0.05	N/A
NABWI18	0.07	AAEL017179	NADAI50	0.07	AAEL006511				NACNJ04	0.07	AAEL006315				NADDJ74	0.07	N/A				NADZM47	0.07	AAEL014410	NADDQ08	0.05	N/A	NABPL50	0.05	AAEL003569
NABWI69	0.05	N/A	NADAJ05	0.07	AAEL008054				NACNO30	0.05	N/A				NADDK53	0.05	AAEL005412				NADZO42	0.07	N/A	NADE576	0.05	AAEL003261	NABPN64	0.05	AAEL002870
NABWJ78	0.07	N/A	NADAJ55	0.07	AAEL002759				NADA177	0.05	N/A				NADDW49	0.07	AAEL003528				NAAFV47	0.05	N/A	NADXY92	0.05	N/A	NABPN79	0.07	N/A
NABWN54	0.05	N/A	NADB547	0.07	N/A				NADA459	0.05	AAEL007642				NADV185	0.07	N/A				NAAG486	0.07	AAEL000470	NADYP40	0.05	N/A	NABPP67	0.07	AAEL010516
NABWT06	0.07	AAEL002066	NADBM46	0.07	N/A				NADAK58	0.05	AAEL017342				NADVJ58	0.05	AAEL012041				NAAGJ70	0.05	AAEL003785	NAEA191	0.05	N/A	NABPR07	0.07	AAEL010509
NABWW39	0.07	AAEL014323	NADBV52	0.05	N/A				NADAT63	0.05	N/A				NADW623	0.05	N/A				NAAGK58	0.07	AAEL015434	NAAF264	0.05	AAEL009889	NABPS69	0.05	N/A
NABWX32	0.07	AAEL017357	NADBV65	0.05	N/A				NADBG64	0.05	N/A				NADW651	0.07	AAEL012856				NAAGO50	0.05	AAEL001751	NAAF576	0.05	N/A	NABPW78	0.05	N/A
NABXC78	0.07	AAEL010756	NADCQ70	0.07	AAEL001432				NADBJ93	0.07	AAEL004593				NADXH95	0.05	N/A				NAAGQ01	0.05	N/A	NAAF829	0.05	AAEL000301	NABQ382	0.05	N/A
NABXI56	0.07	AAEL014871	NADD186	0.07	N/A				NADBL57	0.05	AAEL007078				NADXJ30	0.07	AAEL008849				NAAHJ30	0.07	N/A	NAAFL21	0.05	N/A	NABQ561	0.07	AAEL003743
NABXN26	0.07	N/A	NADDB44	0.07	N/A				NADDG06	0.07	AAEL007230				NADXQ07	0.07	AAEL014374				NAAI330	0.05	AAEL005298	NAAFS44	0.07	AAEL002107	NABQ608	0.07	AAEL011475
NABXP83	0.05	N/A	NADDT78	0.07	N/A				NADVN25	0.05	N/A				NADXR27	0.07	AAEL000941				NABMJ68	0.05	AAEL014055	NAAG158	0.07	N/A	NABQ747	0.07	AAEL006568
NABXQ22	0.05	AAEL002508	NADDV36	0.07	AAEL007022										NADY245	0.07	N/A				NABMO87	0.05	AAEL017363	NAAHC05	0.07	N/A	NABQC46	0.07	AAEL001301
NABXT87	0.07	AAEL006724	NADE790	0.05	AAEL009275										NADYC86	0.07	AAEL013221				NABN083	0.07	N/A	NAAHT62	0.07	N/A	NABQD57	0.05	N/A
NABXY08	0.05	AAEL007426	NADV020	0.05	AAEL006696										NADYM24	0.07	AAEL007151				NABN216	0.05	N/A	NAAHV88	0.07	N/A	NABRR29	0.07	N/A
NABY028	0.07	AAEL011583	NADVI49	0.07	AAEL013074										NADYM66	0.07	AAEL013494				NABNT92	0.07	AAEL008519	NABM865	0.05	AAEL001688	NABS128	0.05	AAEL005717
NABY626	0.05	AAEL004175	NADVM30	0.05	AAEL007053										NADYX80	0.07	AAEL002963				NABP955	0.07	AAEL013065	NABNB15	0.05	N/A	NABS645	0.05	AAEL011399
NABYA10	0.07	N/A	NADVM44	0.07	N/A										NADZF58	0.07	N/A				NABR494	0.07	AAEL001111	NABO956	0.07	AAEL008739	NABSA24	0.07	N/A
NABYC45	0.07	AAEL013272	NADW070	0.07	N/A										NADZF94	0.07	N/A				NABR541	0.05	N/A	NABP486	0.05	N/A	NABSV41	0.07	AAEL003129
NABYC68	0.05	N/A	NADWD21	0.07	AAEL001516										NADZL18	0.05	N/A				NABR974	0.05	N/A	NABP633	0.05	AAEL008250	NABT564	0.07	N/A
NABYD82	0.07	N/A	NADXS79	0.07	N/A										NADZM10	0.07	AAEL009569				NABRC47	0.05	AAEL007659	NABPA54	0.07	AAEL012612	NABTY40	0.05	AAEL011240
NABYF90	0.05	N/A	NADXU24	0.05	AAEL002793										NADZP45	0.05	N/A				NABRK29	0.07	AAEL007951	NABPS17	0.07	AAEL000982	NABU121	0.07	N/A
NABZ310	0.05	AAEL010955	NADYH83	0.05	N/A										NADZR38	0.05	AAEL007365				NABS145	0.07	AAEL011242	NABPT30	0.07	AAEL010601	NABUZ76	0.05	N/A
NABZA45	0.07	N/A	NAAF035	0.05	AAEL003940										NADZS20	0.07	N/A				NABS888	0.07	AAEL002065	NABQ689	0.05	N/A	NABV403	0.07	N/A
NACA089	0.05	AAEL005573	NAAFC40	0.07	AAEL013694										NADZV24	0.05	N/A				NABSB17	0.07	AAEL011124	NABR884	0.05	AAEL002068	NABW046	0.07	N/A
NACA121	0.07	N/A	NAAFH95	0.05	N/A										NADZV67	0.05	N/A				NABW529	0.05	AAEL012997	NABRK08	0.07	AAEL009287	NABW922	0.05	N/A
NACA388	0.07	AAEL004347	NAAFP73	0.05	N/A										NADZZ91	0.07	AAEL001372				NABWC50	0.05	AAEL015077	NABRS19	0.05	AAEL005901	NABWC78	0.05	N/A
NACA421	0.05	N/A	NAAG213	0.05	AAEL000720										NAAFH64	0.07	AAEL004947				NABWD33	0.05	N/A	NABTA60	0.07	N/A	NABWJ95	0.05	AAEL011161
NACA723	0.07	N/A	NAAG476	0.05	AAEL007293										NAAG868	0.07	N/A				NABWX86	0.07	AAEL003709	NABTU51	0.07	N/A	NABWW76	0.07	AAEL006859
NACA863	0.05	AAEL008057	NAAG755	0.07	AAEL012023										NAAGE87	0.05	N/A				NABWZ77	0.05	AAEL004875	NABU265	0.05	N/A	NABXL12	0.07	AAEL003129
NACA981	0.05	AAEL009082	NAAGM02	0.05	AAEL000940										NAAGI91	0.05	AAEL012426				NABXK47	0.05	AAEL010020	NABWP89	0.07	AAEL004173	NABY281	0.07	AAEL011832
NACB380	0.05	N/A	NAAGR93	0.05	N/A										NAAHC39	0.05	AAEL001844				NABXZ38	0.05	AAEL005016	NABWS74	0.05	N/A	NABY316	0.05	AAEL007432
NACB734	0.07	N/A	NAAGT10	0.05	AAEL005561										NAAI683	0.07	N/A				NABY451	0.05	N/A	NABWU06	0.05	N/A	NABY667	0.07	AAEL007818
NACBB64	0.07	AAEL007841	NAAGU52	0.05	AAEL013734										NAAI916	0.05	N/A				NABYC12	0.05	AAEL011471	NABXO41	0.07	AAEL012435	NABYB61	0.05	AAEL013652
NACBC84	0.05	AAEL011704	NAAGV72	0.05	N/A										NABM863	0.05	N/A				NABZ615	0.05	N/A	NABXY15	0.05	N/A	NABYE25	0.05	N/A
NACBI60	0.05	AAEL014012	NAAHL27	0.07	N/A										NABM895	0.05	AAEL003987				NACA133	0.07	AAEL005395	NABXZ78	0.05	N/A	NABZ773	0.05	AAEL012673
NACBQ95	0.05	AAEL003761	NAAHN45	0.07	N/A										NABOG63	0.05	AAEL010812				NACA383	0.05	AAEL003254	NABZ285	0.07	AAEL002811	NABZ829	0.05	N/A
NACBR13	0.07	AAEL008580	NAAHQ16	0.07	N/A										NABOK08	0.05	AAEL008097				NACA747	0.05	AAEL009341	NACA815	0.05	AAEL006068	NABZ958	0.07	N/A
NACBR89	0.05	AAEL000313	NAAI014	0.05	N/A										NABOK14	0.05	N/A				NACAC52	0.05	N/A	NACAC04	0.05	AAEL013075	NABZB68	0.05	AAEL006751
NACBU71	0.07	AAEL006126	NAAI863	0.05	N/A										NABP676	0.05	N/A				NACAD54	0.05	N/A	NACBH50	0.07	AAEL001791	NACA050	0.05	N/A
NACM438	0.05	AAEL003953	NAAI991	0.05	N/A										NABP875	0.05	N/A				NACAM96	0.05	AAEL009420	NACBJ28	0.05	AAEL001726	NACAF84	0.07	AAEL011317
NACM514	0.05	AAEL013163	NAAID92	0.07	AAEL006485										NABPK62	0.05	AAEL010790				NACAO49	0.05	AAEL007492	NACMA58	0.05	AAEL002420	NACAG96	0.07	AAEL003950
NACM737	0.05	AAEL004823	NAAIF65	0.05	AAEL015427										NABPN52	0.05	N/A				NACAW66	0.05	N/A	NACNE53	0.05	AAEL001674	NACAH18	0.05	AAEL011665
NACMC06	0.07	N/A	NABMT91	0.07	N/A										NABPP54	0.07	N/A				NACB023	0.07	N/A	NADAK67	0.05	N/A	NACAI24	0.05	AAEL011627
NACMF61	0.07	N/A	NABNC14	0.07	N/A										NABQ663	0.05	AAEL005372				NACB118	0.05	AAEL001216	NADCJ64	0.05	AAEL000569	NACAN72	0.07	N/A
NACMP05	0.07	N/A	NABNJ27	0.05	AAEL000191										NABR451	0.05	AAEL010165				NACBF47	0.05	N/A	NADDC63	0.07	AAEL003514	NACAR21	0.05	AAEL013235
NACMR15	0.07	N/A	NABNS17	0.05	AAEL001691										NABRA29	0.05	N/A				NACBO75	0.07	AAEL011307	NADEF08	0.05	N/A	NACAY92	0.07	AAEL005848
NACMU74	0.07	N/A	NABOH96	0.07	N/A										NABRB54	0.05	N/A				NACM020	0.05	AAEL009416	NADXI42	0.05	AAEL003491	NACBB79	0.05	AAEL012187
NACN066	0.07	N/A	NABOK55	0.07	N/A										NABRG11	0.05	N/A				NACMG45	0.07	N/A	NADXJ22	0.05	N/A	NACBM37	0.07	AAEL002865
NACN364	0.05	AAEL011350	NABOT25	0.07	N/A										NABRL60	0.05	N/A				NACMW67	0.05	AAEL009458	NADY789	0.05	N/A	NACBQ80	0.07	AAEL001112
NACNE65	0.05	AAEL017148	NABP477	0.07	AAEL007501										NABRM19	0.07	N/A				NACN280	0.07	N/A				NACBU57	0.05	AAEL004115
NACNJ13	0.07	N/A	NABPB18	0.07	AAEL014380										NABRM56	0.05	N/A				NACN825	0.05	AAEL013028				NACM148	0.05	N/A
NACNL40	0.07	N/A	NABPB37	0.07	N/A										NABS151	0.05	AAEL012764				NACN847	0.05	AAEL001501				NACM202	0.07	AAEL015146
NACNO42	0.07	AAEL009744	NABPC17	0.05	AAEL010756										NABS245	0.07	AAEL009636				NACND38	0.05	AAEL010449				NACM767	0.05	N/A
NACNP76	0.07	N/A	NABQ101	0.07	AAEL014565										NABS864	0.05	N/A				NADAK03	0.05	N/A				NACMD68	0.05	AAEL007232
NACNP95	0.07	N/A	NABQ221	0.05	N/A										NABSF77	0.07	AAEL008025				NADAL93	0.05	N/A				NACMG33	0.07	N/A
NACNU79	0.07	AAEL017098	NABQ538	0.05	AAEL000050										NABT058	0.05	N/A				NADB689	0.05	AAEL006471				NACMO33	0.05	AAEL002512
NADA233	0.05	AAEL017049	NABRD05	0.07	AAEL000026										NABT435	0.05	N/A				NADB827	0.05	AAEL014063				NACMT08	0.05	AAEL001341
NADA310	0.05	N/A	NABRH58	0.05	N/A										NABT454	0.05	N/A				NADC591	0.05	N/A				NACMY04	0.05	N/A
NADA393	0.07	N/A	NABRI02	0.07	N/A										NABTO29	0.05	AAEL010027				NADC793	0.07	N/A				NACN110	0.07	AAEL007761
NADAC22	0.05	N/A	NABRI47	0.07	N/A										NABW435	0.07	N/A				NADCD88	0.07	N/A				NADAM61	0.07	AAEL004694
NADAE19	0.07	N/A	NABRP04	0.07	AAEL008596										NABW984	0.07	N/A				NADCQ32	0.05	N/A				NADAW77	0.05	N/A
NADAE29	0.07	AAEL012686	NABS934	0.05	AAEL011302										NABWA52	0.05	AAEL010464				NADDJ43	0.05	AAEL011243				NADBM64	0.07	N/A
NADAF73	0.05	N/A	NABS968	0.07	AAEL011737										NABWL24	0.07	N/A				NADEA52	0.07	AAEL004460				NADBV14	0.07	AAEL006153
NADAS21	0.05	AAEL005471	NABSA23	0.05	AAEL008853										NABWO07	0.05	AAEL003344				NADVA14	0.07	AAEL011195				NADC587	0.05	N/A
NADAT72	0.07	N/A	NABSA27	0.07	AAEL003157										NABWP66	0.05	AAEL004682				NADW975	0.05	AAEL010066				NADC918	0.07	N/A
NADAU55	0.07	N/A	NABTQ38	0.05	AAEL000716										NABWQ08	0.05	AAEL004042				NADXB06	0.07	AAEL000217				NADCB50	0.05	N/A
NADAU69	0.07	N/A	NABTU93	0.07	N/A										NABWS44	0.05	N/A				NADXQ10	0.07	N/A				NADD121	0.07	AAEL001544
NADB005	0.05	AAEL003485	NABU117	0.07	N/A										NABWT72	0.05	AAEL006560				NADXX78	0.07	AAEL006426				NADDA63	0.07	AAEL004412
NADB382	0.05	N/A	NABUN22	0.05	AAEL010427										NABX033	0.07	N/A				NADZ160	0.05	N/A				NADDD47	0.05	AAEL008501
NADBC38	0.07	AAEL011470	NABV550	0.07	AAEL011655										NABX944	0.05	AAEL017257				NADZF62	0.05	N/A				NADE575	0.05	AAEL009151
NADBH48	0.07	AAEL009364	NABWD12	0.07	N/A										NABXV52	0.05	N/A				NADZN23	0.05	N/A				NADE829	0.07	AAEL002550
NADBU91	0.07	N/A	NABWE54	0.05	AAEL001898										NABXX72	0.05	AAEL003887				NAEA023	0.05	N/A				NADE926	0.07	AAEL003469
NADC384	0.05	AAEL007385	NABWJ47	0.07	N/A										NABY695	0.07	AAEL004338										NADEF37	0.05	N/A
NADC505	0.05	AAEL005733	NABWQ65	0.05	AAEL004699										NABY747	0.05	AAEL009857										NADEF81	0.07	AAEL006951
NADCR41	0.05	N/A	NABWQ90	0.07	N/A										NABY981	0.05	AAEL002060										NADYS15	0.07	AAEL013827
NADCU29	0.07	AAEL004092	NABWR19	0.07	AAEL007671										NACA153	0.07	AAEL005428										NAAGO47	0.07	AAEL007562
NADCV68	0.07	AAEL003161	NABWV83	0.07	AAEL006583										NACAG39	0.07	AAEL012904										NAAHS78	0.05	AAEL013648
NADCX92	0.07	N/A	NABX454	0.07	AAEL005902										NACAO54	0.05	N/A										NAAI041	0.07	N/A
NADCZ28	0.05	AAEL004132	NABXU50	0.05	AAEL010247										NACAP22	0.05	N/A										NAAI512	0.05	AAEL014199
NADD636	0.07	AAEL007290	NABXX12	0.07	N/A										NACAQ04	0.07	N/A										NABM070	0.07	AAEL007106
NADD660	0.07	AAEL017395	NABXZ90	0.07	N/A										NACB237	0.07	N/A										NABMC48	0.07	AAEL003148
NADDB13	0.07	AAEL005523	NABY829	0.07	AAEL010814										NACB284	0.07	N/A										NABMG18	0.05	AAEL010048
NADDL78	0.05	AAEL017075	NABYD78	0.05	AAEL001158										NACB633	0.05	AAEL007135										NABMS54	0.07	AAEL008319
NADDS13	0.05	AAEL010229	NABZ244	0.05	N/A										NACBQ91	0.07	N/A										NABMT31	0.05	N/A
NADEB26	0.05	N/A	NABZ318	0.05	AAEL010991										NACBQ93	0.05	AAEL005843										NABNN67	0.05	AAEL007322
NADWA15	0.05	AAEL001060	NABZ918	0.07	AAEL001378										NACBR17	0.07	AAEL009459										NABNP66	0.07	AAEL007000
NADWC56	0.05	N/A	NACA066	0.07	AAEL008329										NACM178	0.05	AAEL013293										NABNR55	0.07	N/A
NADXH81	0.07	N/A	NACA258	0.05	AAEL010722										NACM304	0.07	AAEL011736										NABO440	0.07	N/A
NADY151	0.05	AAEL003210	NACA470	0.05	N/A										NACMO95	0.05	AAEL014261										NABO449	0.05	N/A
NADY177	0.07	N/A	NACA704	0.05	AAEL003087										NACNA59	0.05	AAEL008857										NABO931	0.05	N/A
NADYZ87	0.05	N/A	NACAB38	0.07	AAEL008757										NADAE83	0.05	AAEL007651										NABOA44	0.07	N/A
NADZN21	0.05	AAEL008029	NACAC07	0.05	AAEL003435										NADAP95	0.05	N/A										NABOE72	0.05	AAEL006253
NADZO25	0.05	N/A	NACAG17	0.07	AAEL014036										NADAQ84	0.07	AAEL014760										NABOJ12	0.05	AAEL002860
NAAFB90	0.05	AAEL001090	NACAN49	0.07	N/A										NADAV10	0.05	AAEL011622										NABOX94	0.05	AAEL001804
NAAFC84	0.07	AAEL004176	NACAS56	0.05	N/A										NADAZ52	0.07	N/A										NABPQ76	0.07	N/A
NAAFE91	0.05	AAEL010565	NACAT35	0.05	N/A										NADBC78	0.07	N/A										NABQ453	0.05	AAEL008835
NAAFY10	0.07	AAEL004952	NACB278	0.07	AAEL013658										NADBC90	0.05	N/A										NABQ802	0.05	AAEL003372
NAAG151	0.07	N/A	NACB746	0.05	N/A										NADBH78	0.05	N/A										NABQC29	0.05	AAEL005657
NAAG926	0.07	N/A	NACBD19	0.05	N/A										NADBK90	0.05	N/A										NABRU03	0.07	N/A
NAAG950	0.07	N/A	NACBK10	0.07	AAEL013407										NADBV33	0.07	AAEL002148										NABRV30	0.07	N/A
NAAGA09	0.05	AAEL007714	NACBL80	0.05	AAEL011023										NADBX90	0.05	AAEL004445										NABRY21	0.07	AAEL010198
NAAGA30	0.05	AAEL017212	NACBN69	0.07	N/A										NADC435	0.07	N/A										NABT396	0.05	AAEL003010
NAAGI89	0.07	AAEL007595	NACN312	0.05	AAEL013610										NADCE48	0.05	AAEL006743										NABTN88	0.05	AAEL007986
NAAGO23	0.07	N/A	NACNM30	0.07	AAEL003331										NADCP39	0.07	AAEL008719										NABUG84	0.05	N/A
NAAGP38	0.05	N/A	NADA132	0.07	AAEL002726										NADCU09	0.07	AAEL006408										NABWV49	0.07	AAEL017357
NAAGQ10	0.07	AAEL004406	NADAL43	0.07	AAEL011756										NADDM18	0.05	AAEL008213										NABY866	0.05	AAEL001920
NAAHC55	0.05	AAEL011446	NADAO32	0.07	AAEL006785										NADE131	0.05	N/A										NABYE03	0.05	N/A
NAAHD15	0.07	AAEL012209	NADBA22	0.07	AAEL010048										NADE161	0.07	AAEL011589										NACA369	0.05	AAEL006836
NAAHR21	0.07	N/A	NADBJ91	0.05	N/A										NADE173	0.05	N/A										NACA489	0.05	AAEL002597
NAAHR80	0.05	AAEL007015	NADBK58	0.07	N/A										NADE928	0.07	AAEL002843										NACAK04	0.05	N/A
NAAHY20	0.05	N/A	NADBL46	0.05	N/A										NADV766	0.05	N/A										NACAK05	0.05	AAEL003572
NAAI247	0.05	AAEL011542	NADCY72	0.07	AAEL014078										NADVN12	0.07	AAEL005145										NACAL49	0.05	AAEL011334
NAAI844	0.07	N/A	NADDD61	0.07	AAEL008216										NADVR04	0.05	AAEL009937										NACAM48	0.05	AAEL013979
NAAIA87	0.07	N/A	NADDJ15	0.05	N/A										NADW427	0.07	AAEL012574										NACB463	0.05	N/A
NAAIC06	0.07	N/A	NADDQ02	0.05	AAEL007942										NADWE89	0.05	AAEL010568										NACBI10	0.05	AAEL013907
NABMA27	0.05	AAEL006146	NADDU40	0.07	N/A										NADWW30	0.05	N/A										NACBR67	0.05	AAEL006948
NABMV23	0.07	N/A	NADV720	0.07	N/A										NADX445	0.07	AAEL009154										NACMR05	0.07	AAEL009891
NABMY32	0.05	AAEL009129	NADVJ55	0.07	AAEL004196										NADX828	0.05	N/A										NACN413	0.07	AAEL003019
NABMY53	0.05	AAEL009529	NADW752	0.07	N/A										NADXA43	0.05	AAEL015160										NADB575	0.05	AAEL001984
NABN392	0.05	N/A	NADW861	0.07	AAEL006654										NADXM17	0.05	N/A										NADBI46	0.07	AAEL001447
NABNE07	0.05	AAEL014344	NADW866	0.05	AAEL015458										NADXS45	0.07	AAEL007290										NADBQ08	0.05	N/A
NABNL18	0.07	AAEL000214	NADWQ02	0.07	AAEL010076										NADXX14	0.07	N/A										NADBV24	0.05	N/A
NABNL42	0.07	AAEL013614	NADX783	0.07	AAEL011476										NADXY36	0.05	AAEL014958										NADBZ02	0.05	AAEL006971
NABNT54	0.05	N/A	NADXL53	0.07	AAEL001972										NADY895	0.07	N/A										NADCE32	0.07	N/A
NABO617	0.05	N/A	NADXQ77	0.07	N/A										NADYH03	0.07	N/A										NADCH54	0.07	N/A
NABO832	0.07	AAEL011144	NADXS34	0.07	N/A										NADYZ19	0.05	N/A										NADCU87	0.05	N/A
NABOB17	0.07	N/A	NADXX03	0.05	AAEL013028										NADYZ85	0.07	N/A										NADD745	0.05	AAEL007984
NABP873	0.07	N/A	NADZS50	0.07	AAEL000087										NADZ264	0.07	AAEL004779										NADDH71	0.07	N/A
NABP881	0.07	AAEL006223													NADZ349	0.05	N/A										NADDS62	0.05	AAEL008865
NABPA68	0.05	N/A													NADZ826	0.07	N/A										NADE515	0.05	AAEL005715
NABPA82	0.05	AAEL007523													NADZD83	0.05	AAEL005100										NADE869	0.07	N/A
NABPF09	0.05	AAEL013869													NADZQ92	0.07	N/A										NADX995	0.07	AAEL012026
NABPN94	0.07	AAEL007229													NADZV04	0.07	N/A										NADXB12	0.07	N/A
NABPP16	0.05	AAEL013025													NADZW22	0.07	AAEL010834										NADZL01	0.07	AAEL010892
NABPU28	0.07	N/A																									NADZZ34	0.05	AAEL012301
NABPX29	0.07	AAEL007634
NABQC24	0.05	AAEL004563
NABRT42	0.05	AAEL004943
NABRW32	0.05	AAEL009431
NABS513	0.07	N/A
NABS758	0.07	AAEL006751
NABSB09	0.05	N/A
NABSC66	0.05	AAEL000460
NABSD16	0.05	AAEL003130
NABSE73	0.05	N/A
NABSF33	0.05	N/A
NABSG76	0.05	AAEL004019
NABSZ30	0.05	N/A
NABT108	0.07	N/A
NABUM57	0.05	AAEL012827
NABUV19	0.07	AAEL010671
NABV501	0.05	AAEL010348
NABW394	0.07	N/A
NABW752	0.05	N/A
NABWA74	0.05	AAEL005339
NABWA75	0.05	N/A
NABWG45	0.05	N/A
NABWH80	0.05	AAEL004526
NABWN14	0.07	N/A
NABWT40	0.07	N/A
NABWT80	0.05	AAEL008163
NABXQ54	0.05	N/A
NABY153	0.07	AAEL006395
NABY443	0.07	AAEL007441
NABY564	0.05	AAEL010821
NABY578	0.05	N/A
NABY661	0.07	AAEL010435
NABY832	0.05	AAEL003606
NABY839	0.05	AAEL005756
NABYA21	0.05	N/A
NABYF03	0.05	AAEL011859
NABZA71	0.07	AAEL002382
NABZD49	0.05	AAEL010094
NABZE48	0.07	N/A
NACA113	0.05	AAEL007907
NACA854	0.05	AAEL013182
NACA923	0.05	AAEL008004
NACAA16	0.05	AAEL005028
NACAF04	0.05	AAEL000550
NACAF17	0.07	AAEL011354
NACAJ44	0.07	AAEL001701
NACB006	0.05	N/A
NACB469	0.05	AAEL005880
NACB765	0.05	AAEL011564
NACBS25	0.05	N/A
NACBT34	0.05	AAEL012479
NACBT40	0.07	AAEL004586
NACM066	0.07	AAEL012540
NACM370	0.05	N/A
NACM428	0.05	N/A
NACM613	0.07	N/A
NACMF88	0.05	AAEL000719
NACNJ67	0.05	N/A
NADA542	0.05	AAEL014874
NADA929	0.07	AAEL013620
NADAA40	0.07	AAEL001887
NADAB94	0.05	AAEL005896
NADAE80	0.07	N/A
NADAF94	0.07	N/A
NADAK86	0.05	AAEL001952
NADAV03	0.07	AAEL007659
NADAV92	0.05	AAEL008073
NADBJ52	0.05	AAEL005722
NADBR52	0.07	AAEL009706
NADC341	0.07	AAEL001540
NADCD57	0.07	AAEL003016
NADD427	0.05	AAEL017334
NADD482	0.07	N/A
NADDJ85	0.05	AAEL000672
NADDW77	0.07	AAEL009282
NADW430	0.07	N/A
NADWB03	0.07	AAEL002140
NADWC87	0.07	AAEL009298
NADWW45	0.05	AAEL008753
NADX329	0.05	N/A
NADY348	0.07	AAEL012500
NADY971	0.05	N/A
NADZH30	0.07	N/A
NADZQ20	0.05	AAEL003793
